# Supplementary material
Source: PubMed Central journal article supplement (PMC4042175)
Supplement: cr201452x1.pdf [file cr201452x1.pdf]

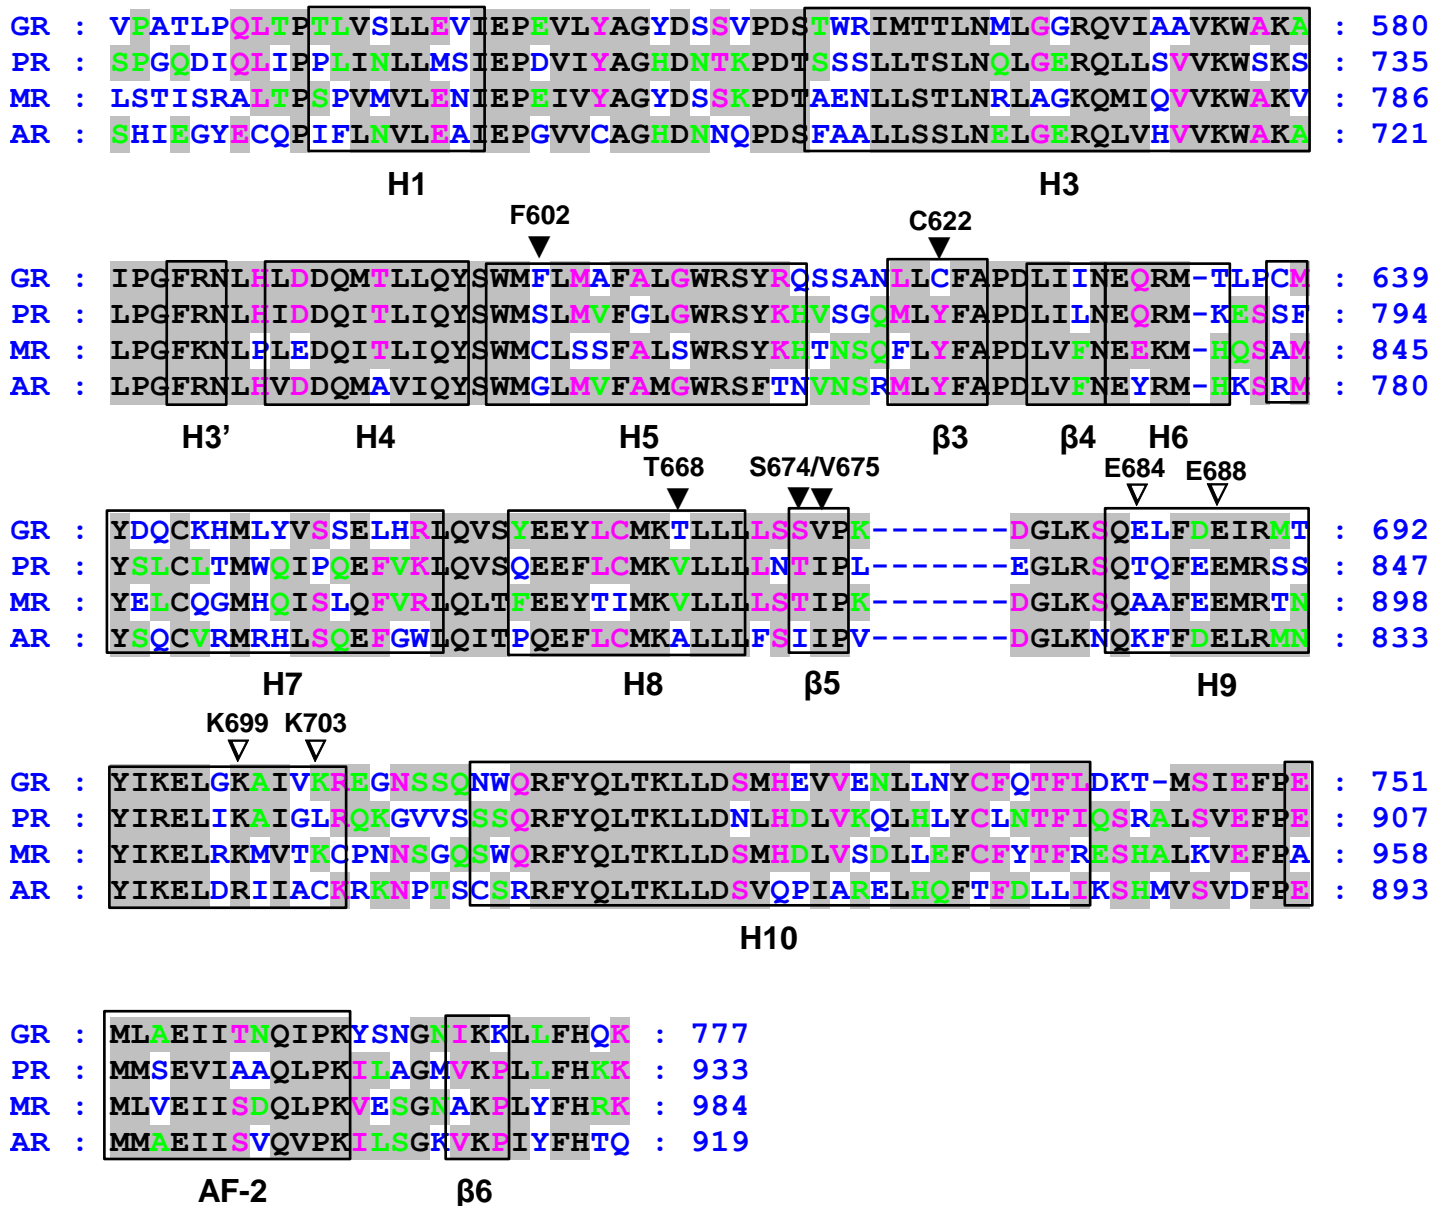

**Supplementary information, Figure 1A.** Protein sequence alignment of the LBDs of GR, PR, MR, and AR. The residues that were replaced to increase solubility are marked by “▼”. The residues that were replaced to increase crystal packing are marked by “▽”.

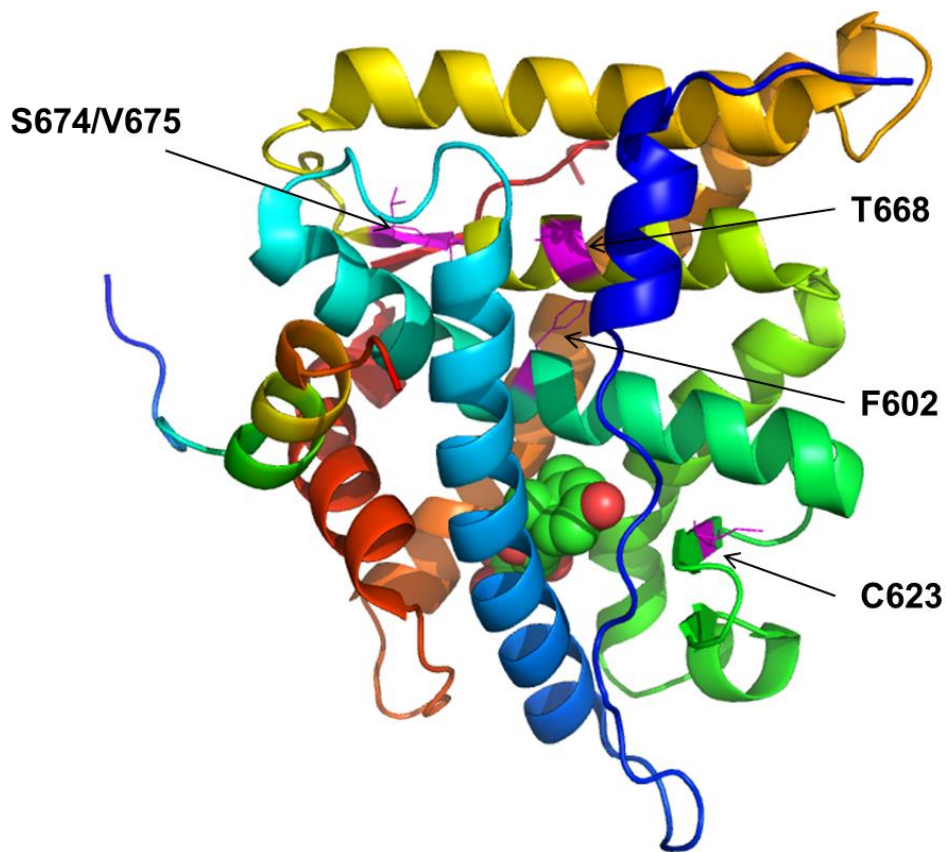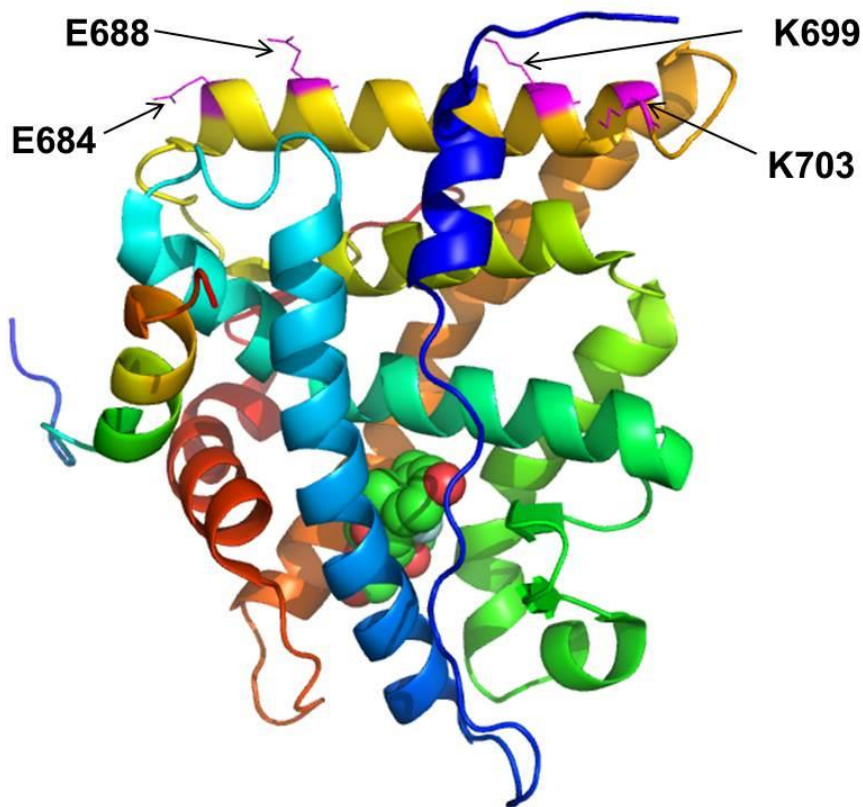

**Supplementary information, Figure 1B.** Positions of solubility mutations and crystallization mutations. Upper panel: positions of mutations that help solubilize GR LBD; lower panel: surface mutations that facilitated crystallization of GR LBD.
