# Supplementary material
Source: PubMed Central journal article supplement (PMC4042175)
Supplement: cr201452x2.pdf [file cr201452x2.pdf]

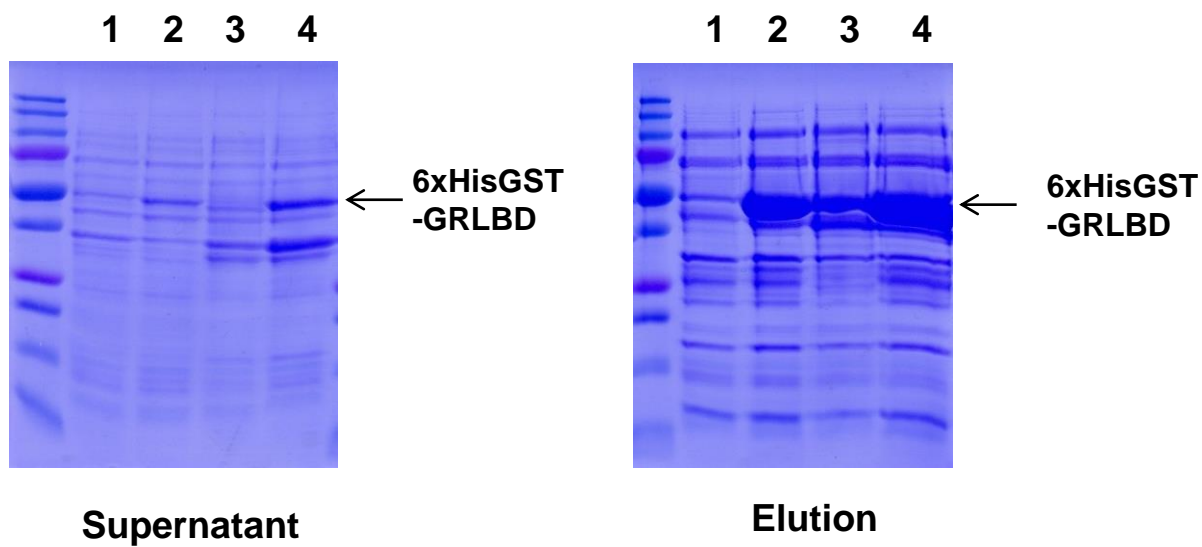

**1: F602S**  
**2: AYVTI**  
**3: AYVTI EAEA**  
**4: AYVTI KAKA**

**Supplementary information, Figure 2.** Protein expression and purification of selected GR LBD mutant proteins. Constructs were expressed and purified in the presence of 10  $\mu$ M cortisol.
