# Supplementary material
Source: PubMed Central journal article supplement (PMC4042175)
Supplement: cr201452x3.pdf [file cr201452x3.pdf]

**A**

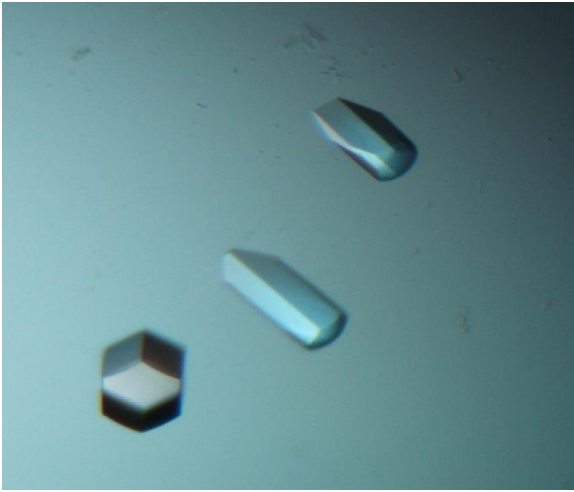

**Cortisol-bound GR LBD**

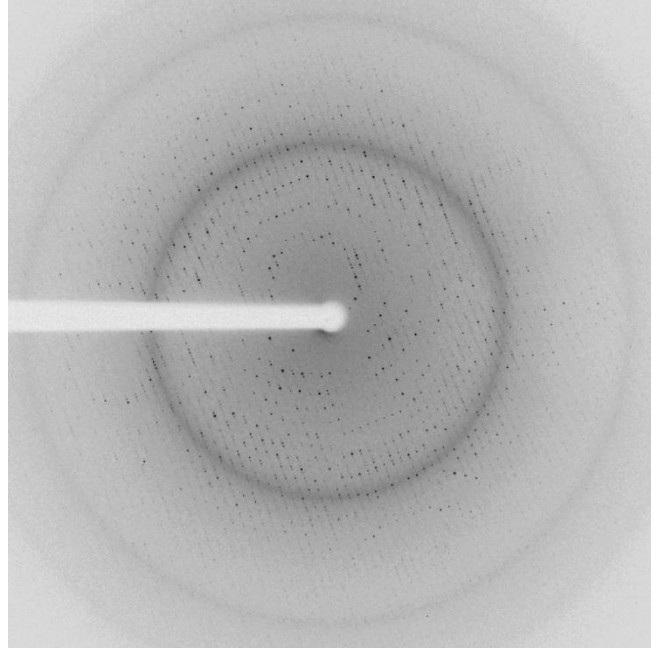

**B**

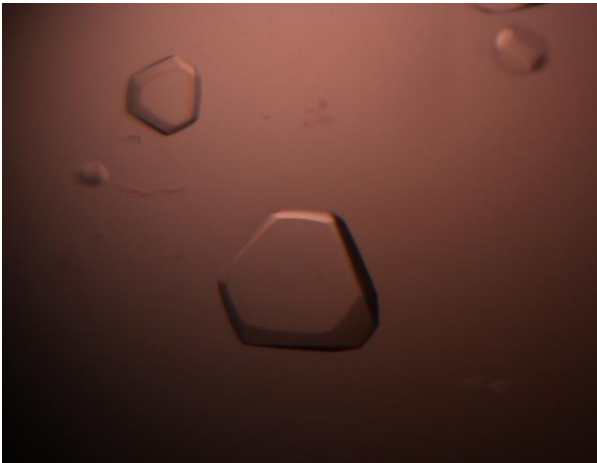

**MF-bound GR LBD**

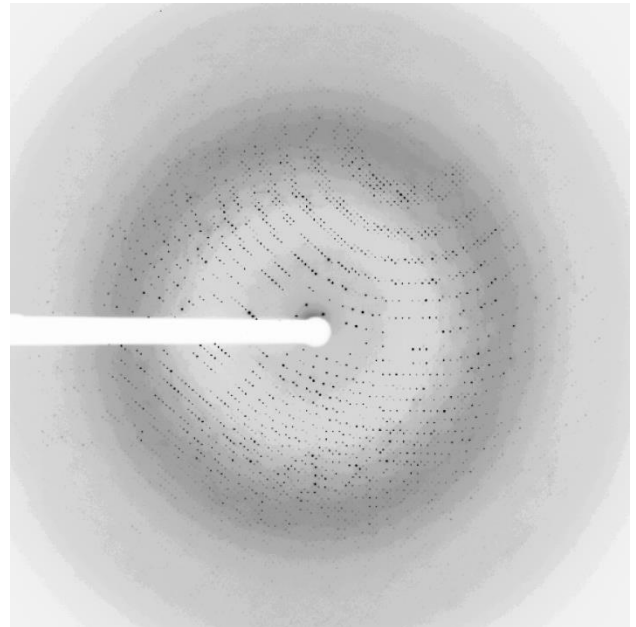

**Supplementary information, Figure 3.** Protein crystals and diffraction images of cortisol- and MF- bound GR LBD. (A) Cortisol-bound GR LBD. (B) MF-bound GR LBD.
