# Supplementary material
Source: PubMed Central journal article supplement (PMC4042175)
Supplement: cr201452x4.pdf [file cr201452x4.pdf]

**A****Induction (MMTV-Luc)**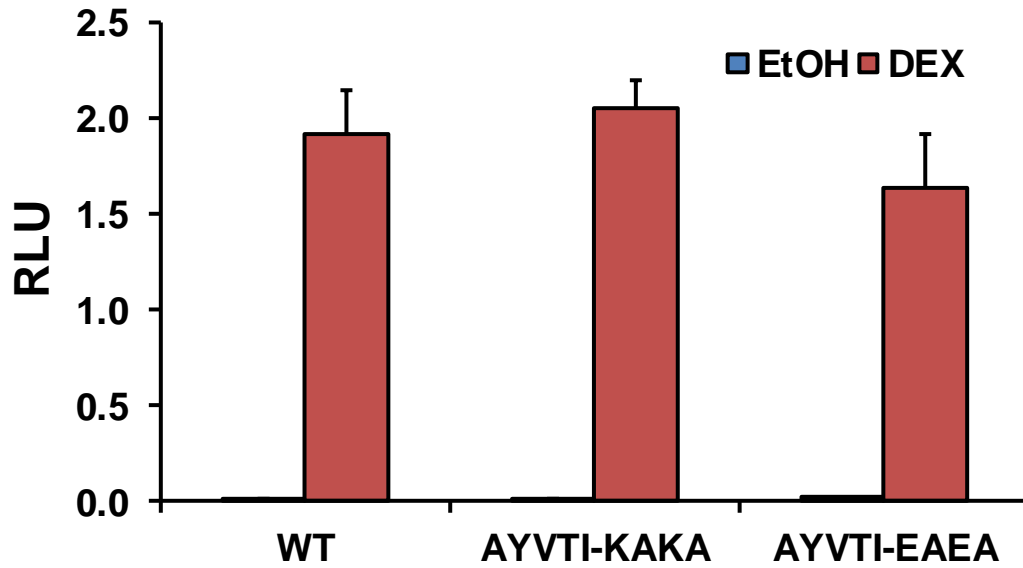**B****Repression (AP1-Luc)**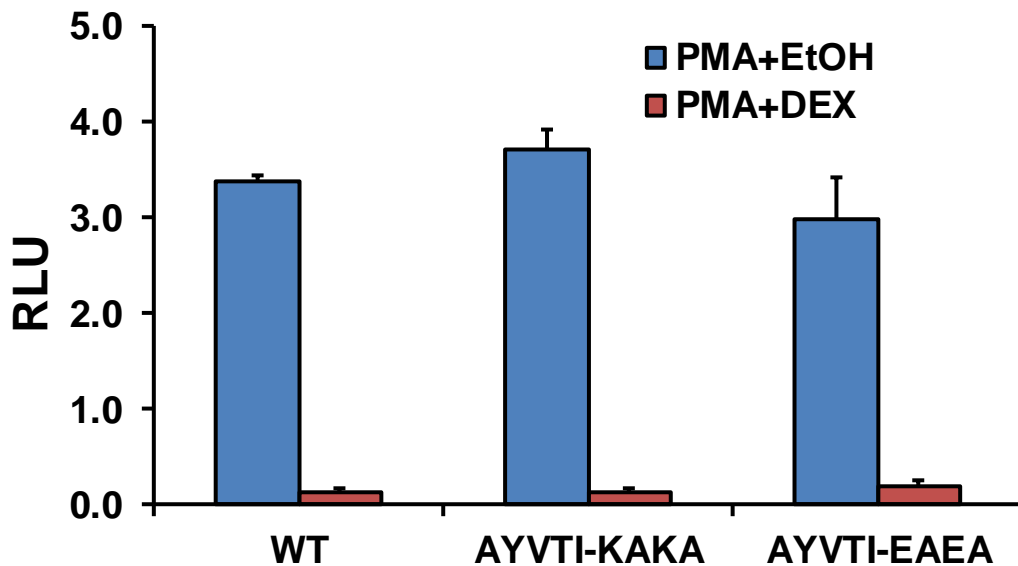

**Supplementary information, Figure 4.** The transcriptional activities of GR AYVTI mutant proteins. (A) MMTV-Luc transactivation activity of GR wildtype (WT) and AYVTI mutant proteins in AD293 cells in the presence or absence of 100 nM DEX. KAKA: K669A/K703A, EAEA: E684A/E688A. Error bars=SD, n=3. (B) AP1-Luc transrepression activity of GR AYVTI mutant proteins in AD293 cells. PMA: phorbol myristate acetate; DEX, 100 nM. Error bars=SD, n=3.
