# Supplementary material
Source: PubMed Central journal article supplement (PMC4042175)
Supplement: cr201452x6.pdf [file cr201452x6.pdf]

**A**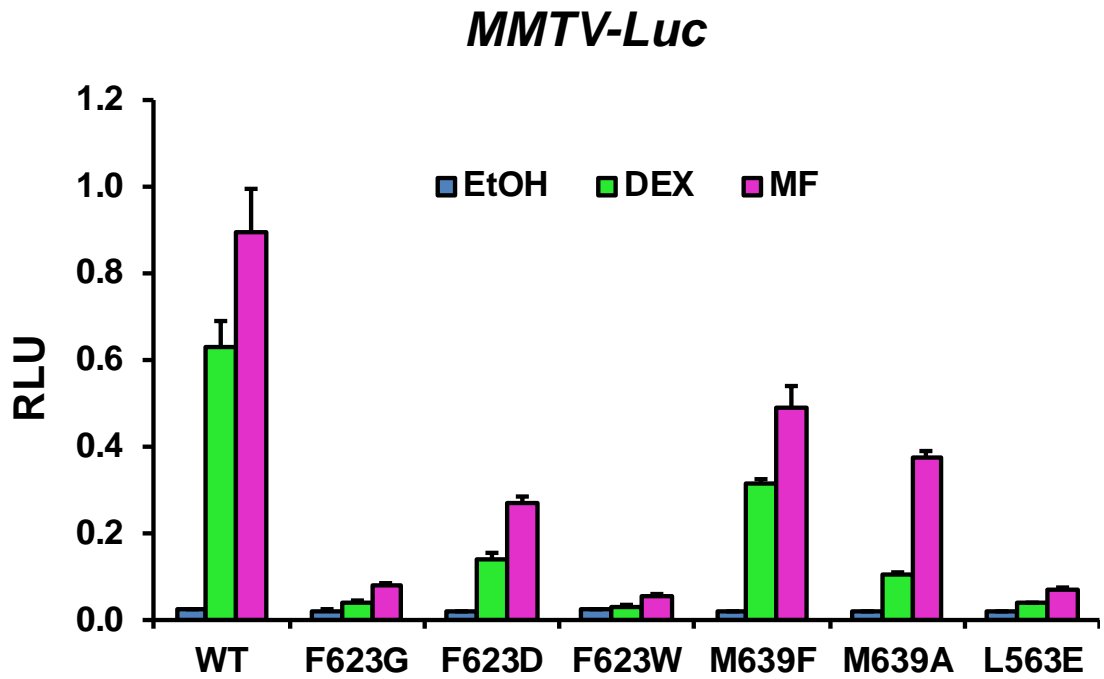**B**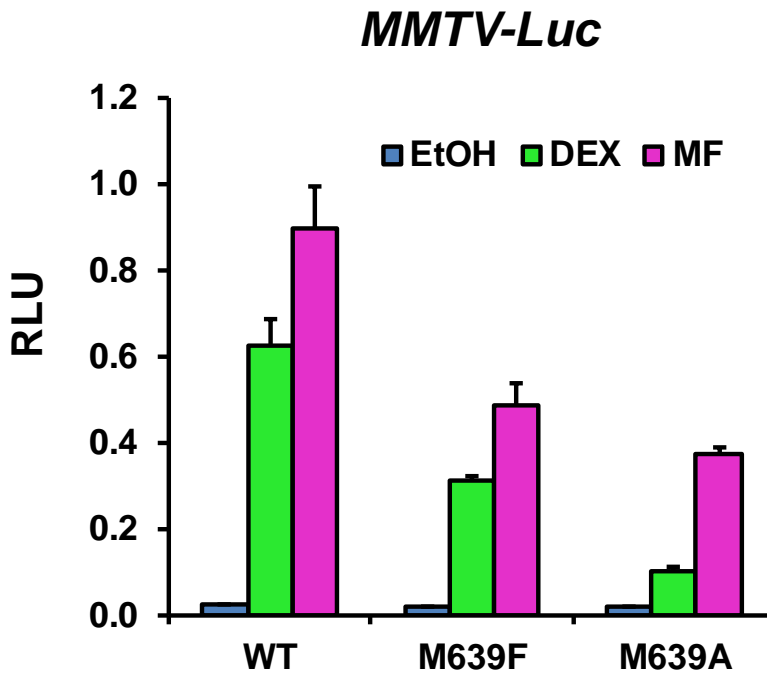

**Supplementary information, Figure 6.** The F623 and M639 mutations cannot separate the transcriptional activities of MF- and DEX-bound GR. (A) Transactivation activity of GR F623 on *MMTV-Luc* reporter activity in AD293 cells. DEX: 10 nM, MF: 1 nM. Error bars=SD, n=3. (B) Transactivation activity of GR M639 on *MMTV-Luc* activity in AD293 cells. DEX: 10 nM, MF: 1 nM. Error bars=SD, n=3.
