# Supplementary material
Source: PubMed Central journal article supplement (PMC4042175)
Supplement: cr201452x7.pdf [file cr201452x7.pdf]

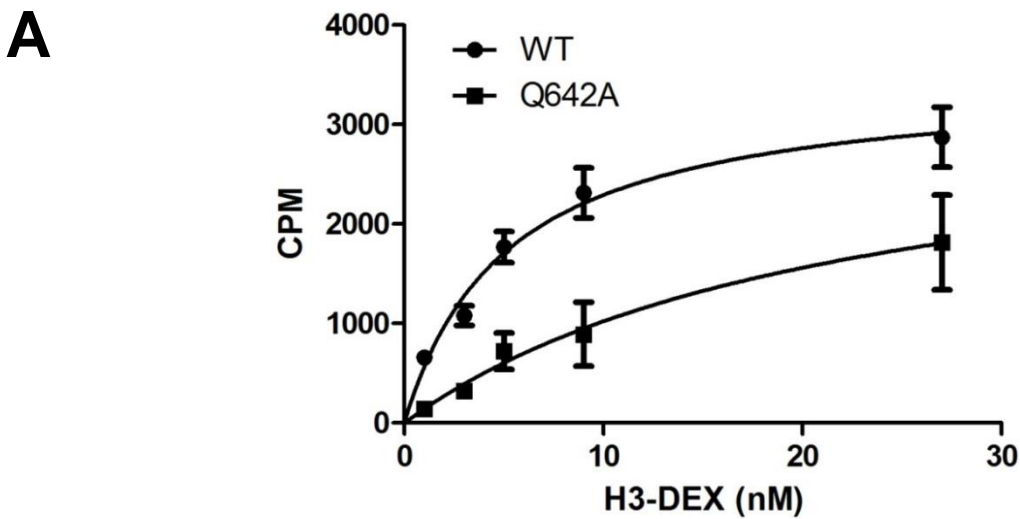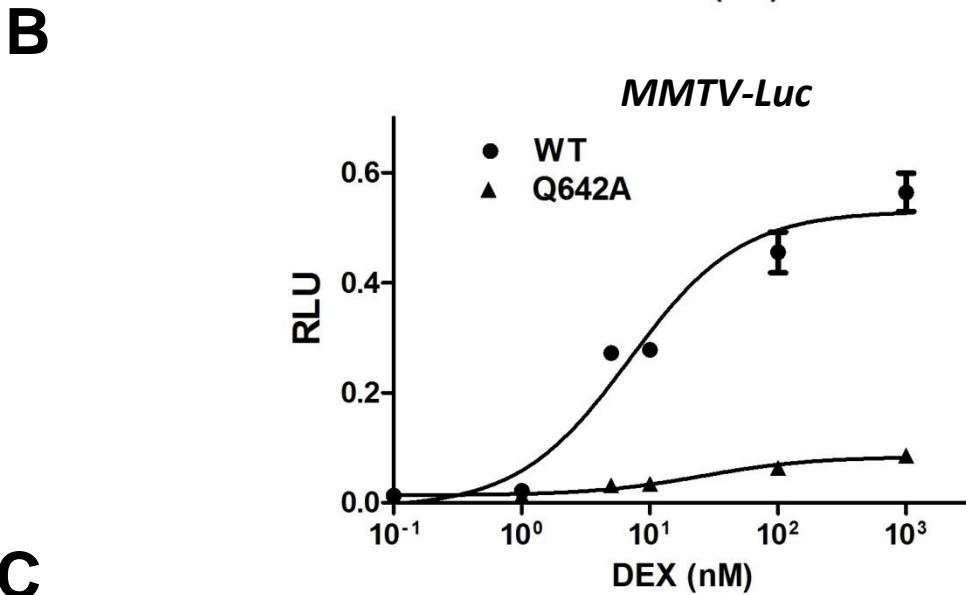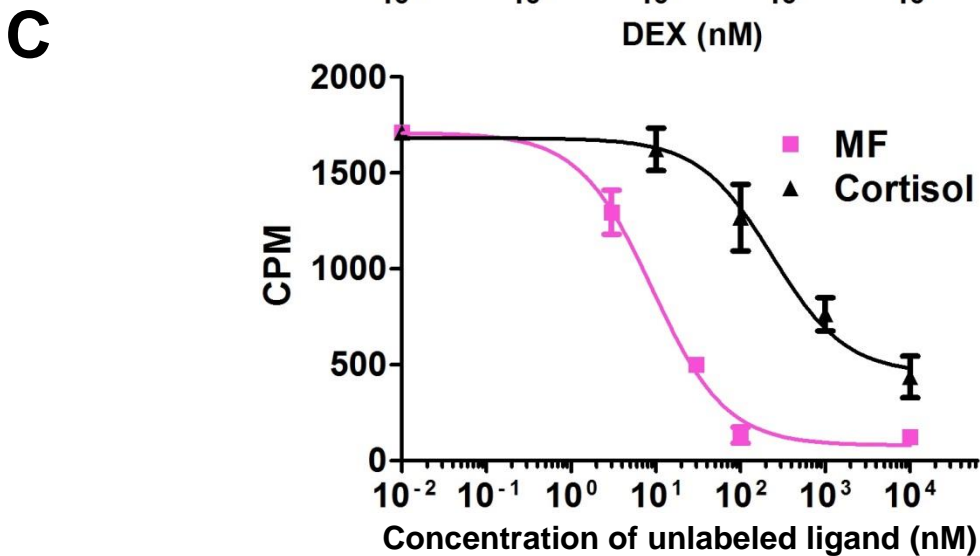

**Supplementary information, Figure 7.** In vitro binding assay of GR Q642A mutant protein. (A), in vitro ligand binding experiment using cytosol from AD293 cells that expressed either wild type GR or Q642A mutant GR. CPM: counts per minute. Error bars=SD, n=2. (B), DEX dose response curve of WT GR and Q642A GR in a MMTV-Luc reporter assay. Error bars=SD, n=3. (C), GR Q642A ligand competition assay. Error bars=SD, n=2.
