# Supplementary material
Source: PubMed Central journal article supplement (PMC4042175)
Supplement: cr201452x8.pdf [file cr201452x8.pdf]

**A**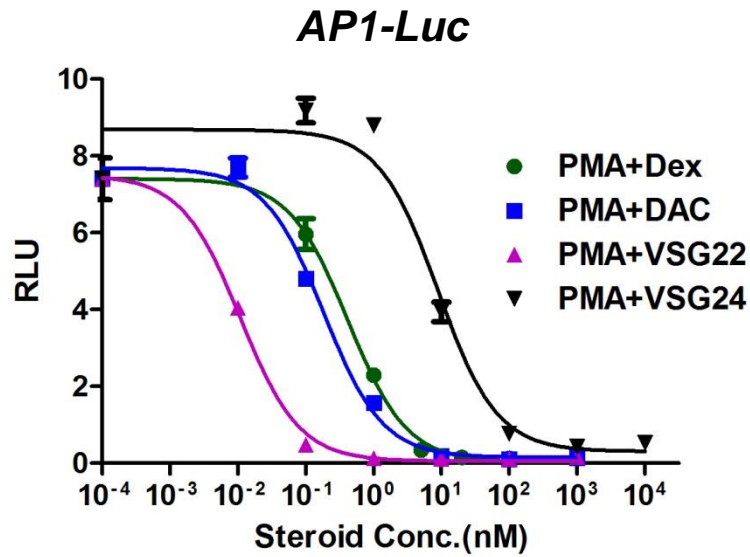**B**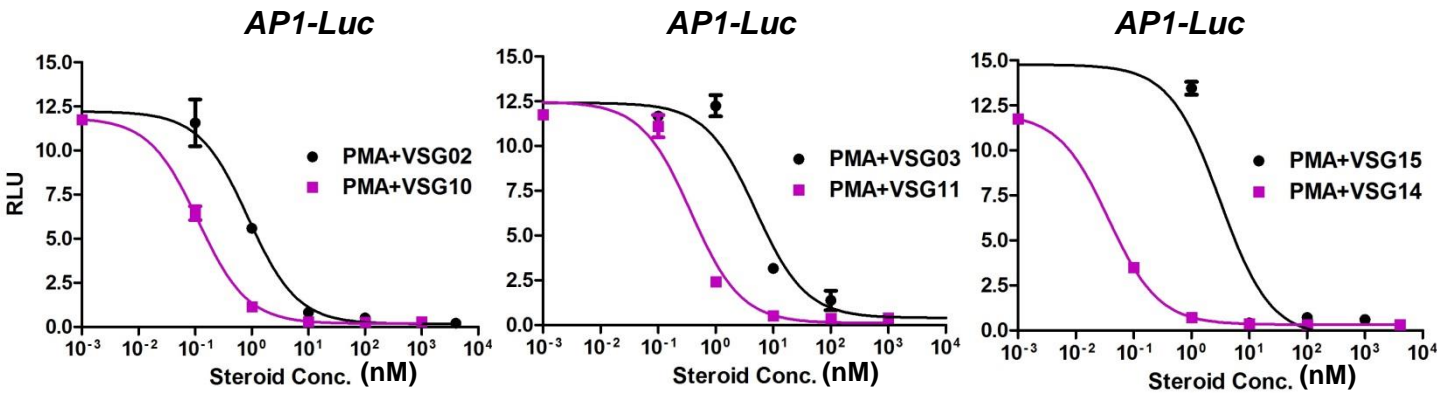

**Supplementary information, Figure 8.** Transrepression properties of compounds with a C-17 $\alpha$  furoate group. (A) Dose response curves of VSG22, VSG24, DAC, and DEX on AP1-Luc activity in AD293 cells. Error bars=SD, n=3. (B) A side by side comparison of compounds with and without introduced C-17 $\alpha$  furoate group (magenta) on potency of transrepression activity on AP1-Luc in AD293 cells. Error bars=SD, n=3.
