# Supplementary material
Source: PubMed Central journal article supplement (PMC4042175)
Supplement: cr201452x9.pdf [file cr201452x9.pdf]

| <b>Table S1. Statistics of data sets and structure refinement</b>      |                                                  |                                                  |
|------------------------------------------------------------------------|--------------------------------------------------|--------------------------------------------------|
|                                                                        | GR/Cortisol                                      | GR/Mometasone                                    |
| PDB code                                                               | 4P6X                                             | 4P6W                                             |
| Data collection                                                        |                                                  |                                                  |
| APS beam line                                                          | APS-21ID                                         | APS-21ID                                         |
| Space group                                                            | P61                                              | P23                                              |
| Resolution, Å                                                          | 30-2.5                                           | 30-1.95                                          |
| Cell parameters, Å, °                                                  | a=b=220.8, c=74.2;<br>α=β=90, γ=120              | a=b=c=130.2;<br>α=β=γ=90                         |
| Total/Unique reflections                                               | 650426 /71878                                    | 545016/53521                                     |
| Completeness, %                                                        | 100 (100)                                        | 99.4 (98.0)                                      |
| I/σ                                                                    | 19.9 (5.2)                                       | 23.5 (2.0)                                       |
| Redundancy                                                             | 9.0 (7.6)                                        | 10.2 (3.7)                                       |
| Rsym                                                                   | 0.10 (0.32)                                      | 0.128 (0.51)                                     |
| Structure determination                                                |                                                  |                                                  |
| Resolution, Å                                                          | 40-2.5                                           | 30-1.95                                          |
| No. reflections                                                        | 71517                                            | 53320                                            |
| NCS molecules                                                          | 6                                                | 1                                                |
| No. residues                                                           | 1362                                             | 264                                              |
| No. solvent molecules                                                  | 487                                              | 130                                              |
| No. of non-H atoms                                                     | 13695                                            | 2315                                             |
| Rcryst                                                                 | 24.9%                                            | 20.8%                                            |
| Rfree                                                                  | 29.2%                                            | 22.7%                                            |
| rmsd bonds, Å                                                          | 0.004                                            | 0.008                                            |
| rmsd angles, °                                                         | 0.886                                            | 1.671                                            |
| Average B factor, Å <sup>2</sup>                                       | 53.0                                             | 33.5                                             |
| Ramachandran statistics                                                | Favored 94.6%,<br>Allowed 4.5%,<br>Outliers 0.9% | Favored 97.7%,<br>Allowed 2.3%,<br>Outliers 0.0% |
| Rmsd is for root-mean-square deviation from ideal geometry of protein. |                                                  |                                                  |
